# Supplementary material for: Evaluation of expression and function of the H+/myo-inositol transporter HMIT
Source: PubMed Central journal article supplement (PMC2717050; doi:10.1186/1471-2121-10-54), 2009-07-16

**A**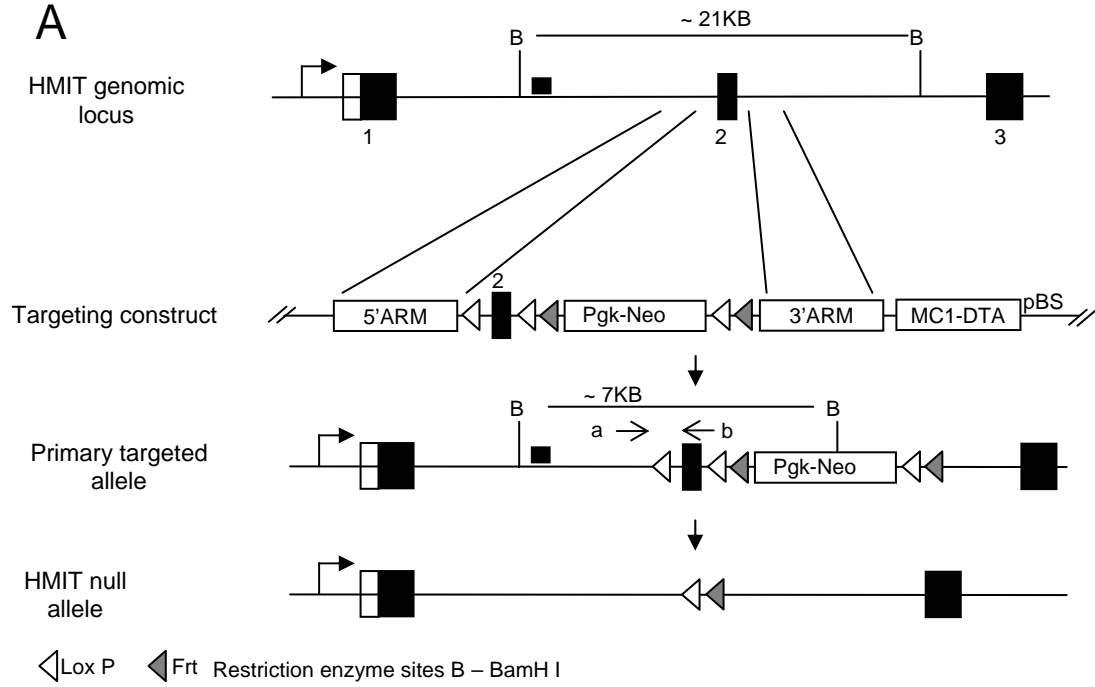**B**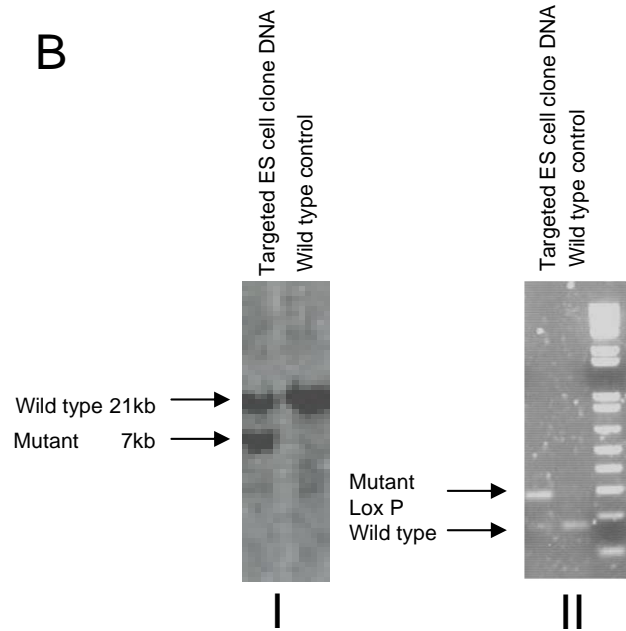**C**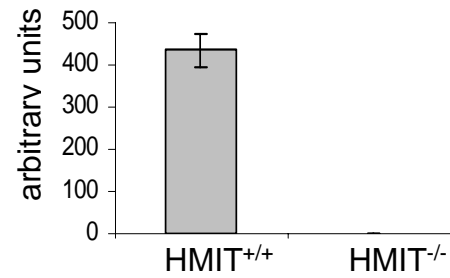

Supplement: 1471-2121-10-54-S4.pdf [file 1471-2121-10-54-S4.pdf]
